# Supplementary material
Source: MDPI journal article supplement (https://www.mdpi.com/2072-4292/8/3/236)
Supplement: s1 [file s1]

## Sheet: Sheet1
Tanintharyi, Myanmar		West Kalimantan, Indonesia
Landsat-8 OLI path-row-date (gap fill date)		Landsat-8 OLI path-row-date (gap fill date)
path-row-date		119059-2015126(2013216)
129052-2015020		119060-2015126(2013168)
130050-2015027(2014024)		119061-2015094(2013152)
130051-2015075		119062-2015046(2014027)
130052-2015027		120059-2015181()
130053-2015043		120060-2015149(2013175)
131050-2015018		120061-2015149(2013175)
131051-2015018		120062-2015229(2013175)
131052-2015034		121059-2015204(2013262)
		121060-2015204(2013262)
		121061-2015204()
		121062-2015220(2013150)
		122059-2015067(2013157)
		122060-2015083(2013157)
Sentinel-1A		Sentinel-1A
Absolute orbit # - frame-path-date		Absolute orbit # - Mission data id - Product id
7382-539-135-00A266-2015-08-22		7323-586-76-00A0D9-2015-08-18
7382-560-135-00A266-2015-08-22		7323-591-76-00A0D9-2015-08-18
7382-554-135-00A266-2015-08-22		7323-596-76-00A0D9-2015-08-18
7382-550-135-00A266-2015-08-22		7323-601-76-00A0D9-2015-08-18
7382-544-135-00A266-2015-08-22		7396-585-149-00A2CB-2015-08-23
7382-539-135-00A266-2015-08-22		7396-590-149-00A2CB-2015-08-23
7382-555-135-00A266-2015-08-22		7396-595-149-00A2CB-2015-08-23
6959-555-62-00A266-2015-07-24		7396-600-149-00A2CB-2015-08-23
6959-550-62-00A266-2015-07-24
PALSAR-2 scene product id		PALSAR-2 scene product id
ALOS2019460200-141002		ALOS2069577170-150906
ALOS2019460230-141002		ALOS2069577180-150906
ALOS2017390220-140918		ALOS2069577160-150906
ALOS2017390250-140918		ALOS2069580000-150906
ALOS2025670260-141113		ALOS2069577190-150906
ALOS2025670270-141113		ALOS2071647170-150920
ALOS2017390190-140918		ALOS2070907190-150915
ALOS2025670240-141113		ALOS2070907180-150915
ALOS2025670210-141113		ALOS2071647180-150920
ALOS2025670220-141113		ALOS2071650000-150920
ALOS2025670250-141113		ALOS2070910000-150915
ALOS2017390210-140918		ALOS2071647190-150920
ALOS2017390230-140918		ALOS2071650010-150920
ALOS2019460280-141002		ALOS2073717180-151004
ALOS2025670230-141113		ALOS2073717170-151004
ALOS2019460290-141002		ALOS2073717190-151004
ALOS2019460270-141002		ALOS2073720000-151004
ALOS2019460260-141002		ALOS2073717150-151004
ALOS2017390200-140918		ALOS2073717160-151004
ALOS2019460250-141002
ALOS2017390290-140918
ALOS2019460240-141002
ALOS2019460220-141002
ALOS2019460210-141002
ALOS2017390270-140918
ALOS2017390260-140918
ALOS2017390240-140918
ALOS2065000280-150806
ALOS2065000280-150806
